# Supplementary material for: The piggyBac transposon-derived genes TPB1 and TPB6 mediate essential transposon-like excision during the developmental rearrangement of key genes in Tetrahymena thermophila
Source: PubMed Central journal article supplement — Genes Dev. 2016 Dec 15;30(24):2724–36. doi: 10.1101/gad.290460.116 (PMC5238731; doi:10.1101/gad.290460.116), 2016-12-15
Supplement: supp_30.24.2724_Supplemental_Table_S4.pdf [file supp_30.24.2724_Supplemental_Table_S4.pdf]

**Supp. Table S4**

|                      |                                          |
|----------------------|------------------------------------------|
| TPB1 KO-5'f-F        | ATGCGCGGCCCGCACCATCACGAAAGAATTCAAATAG    |
| TPB1 KO-5'f-R        | ATGCCTGCAGGACCATATATACCTTTTAGA           |
| TPB1 KO-3'f-F        | ATGCACTAGTCAGGCTAAATTAAGACTATT           |
| TPB1 KO-3'f-R        | ATGCCTCGAGTCACATTTATTTATTTATAT           |
| TPB1hpA-F            | ATGCGGGCCCTATACCTTTAGAGTCAACTCCAGT       |
| TPB1hpA-R            | ATGCCTCGAGGGCTTTTAGGGACAATACACTTTA       |
| TPB1hpB-F            | ATGCGTTTTAACTATACCTTTAGAGTCAACTCCAGT     |
| TPB1hpB-R            | ATGCCCGGGGGCTTTTAGGGACAATACACTTTA        |
| TPB1 RT-PCR-F        | GGAGAGACAAAATATTTAACTAAGG                |
| TPB1 RT-PCR-R        | CCGAGTGGGCATATTTATTGTAAA                 |
| Tub RT-PCR-F         | TCAGTAACCTTCTTCTTCACC                    |
| Tub RT-PCR-R         | CACTGGTTTCAAGGTCGGTAT                    |
| IES-region_N-F       | CTTGTGTTTAGCAAAGTTTG                     |
| IES-region_N-R       | GAGATTCACCTATTAGTTAAATT                  |
| IES-region_E-F       | GATTCCAAGCCAATAGTTAA                     |
| IES-region_E-R       | GATGCTATTCTTTTAGGGTT                     |
| IES-region_G-F       | TTTTAAGTAAAAGGCACATGATCATTTTCAGTAGCACCAG |
| IES-region_G-R       | CCTGCTGTAGGATTAACCTCTTTTATCTGTGTAAA      |
| IES-region_C-F       | TCTTCTTCCTTCTTCTTGCC                     |
| IES-region_C-R       | CAGAAGAAGACAGAAAGAGAAAAGT                |
| IES-region_O-F       | AGATTTCACTAATACTTTCTTTGTGCGTGAC          |
| IES-region_O-R       | GCCAAACATTGACTCTTCTTGTAAGTAAACATCTTT     |
| VMA4 RT-PCR-F        | AAATCTGAAGCAGAAGAGAA                     |
| VMA4 RT-PCR-R        | GTCAAAACGAGCTTTCATTT                     |
| VMA4 5'RACE-gsp-1    | ACTTCACGAGCAAGCTACAA                     |
| VMA4 5'RACE-gsp-2    | TCAAGAGAGTGGTATTCATT                     |
| VMA4 5'RACE-gsp-3    | AGAAAGCAAGATCAACTCTT                     |
| VMA4 RT-SP1-F        | ATGGCAGATTTTATTAA                        |
| VMA4 RT-SP2-F        | ATGAGCTGCTCTTAAAGTGTTAAT                 |
| VMA4 rescue KI-5'f-F | ATGCGGCCGCAAAATGATTCTTAAGTCAATG          |
| VMA4 rescue KI-5'f-R | ATGCCTGCAGTGGCAATAATAAATTACACG           |
| VMA4 rescue KI-3'f-F | ATGCGGATCCTATTAACCATATTATTTAAA           |
| VMA4 rescue KI-3'f-R | ATGCCTCGAGGATAAAGTAAATGCTTTGGA           |
| DOP1 RT-PCR-F        | TCTAGAAAAGCTCTGGAGTT                     |
| DOP1 RT-PCR-R        | GAAGCATGTCTAATTAAGG                      |
| DOP1hpA-F            | ATGCGGGCCCTGAAGAAAAGTACTAGGATTAGC        |
| DOP1hpA-R            | ATGCCTCGAGCAAACATTGACTCTTCTTGT           |
| DOP1hpB-F            | ATGCGTTTTAACTGAAGAAAAGTACTAGGATTAGC      |
| DOP1hpB-R            | ATGCCCGGGCAAACATTGACTCTTCTTGT            |
| DOP1 rescue-F        | AGATGCAAGCGATAATTCTT                     |

|                             |                                                                                                 |
|-----------------------------|-------------------------------------------------------------------------------------------------|
| DOP1 rescue-R               | ACCAGCTACAAGTTCGTTTT                                                                            |
| IES-region_N-rDNA-F         | ATGCCTCGAGAATTTAAATGGCAGATTTTA                                                                  |
| IES-region_N-rDNA-R         | ATGCGGGCCCTAAACGTTTTCTTGAGGTTTATTAAC                                                            |
| IES-region_N-rDNA-F(noIR)   | ATGCCTCGAGAATTTAAATGGCAGATTTTTTAAATAATTTTTTACCTA                                                |
| IES-region_N-rDNA-R(noIR)   | ATGCGGGCCCTAAACGTTTTCTTGAGGTTTAGAGCAGCTCATAAAATTT                                               |
| IES-region_N-rDNA-IRshift-F | ATGCGCTAGCTAAAGTGTTAATAATGCAGAAAGTGATTCTCAACA                                                   |
| IES-region_N-rDNA-IRshift-R | GCATTGCTAGCATAACTTATTTTC                                                                        |
| TIR12-GFP-F                 | ATGCGTTTTAAACATTAACACTTTAAGAACTTTTCACTGGAGTTGTCCC                                               |
| TIR12-GFP-R                 | ATGCGGGCCCATTAACACTTTAGGAGTATTTTGTTGATAATG                                                      |
| TD40-GFP-F                  | ATGCGTTTTAACTTTATTAACACTTAATTAATAATTTTTTACCTATATATTAGAACTTTTCACTGGAGTTGTCCC                     |
| TD40-GFP-R                  | ATGCGGGCCCTTTATTAACACTTTAAGAGCAGCTCATAAAATTTTTGAAAGGAGTATTTTGTTGATAATG                          |
| TD60-GFP-F                  | ATGCGTTTTAACTTTATTAACACTTAATTAATAATTTTTTACCTATATTTAAATCTTTCTAAAATTTTAGAACTTTTCACTGGAGTTGTCCC    |
| TD60-GFP-R                  | ATGCGGGCCCTTTATTAACACTTTAAGAGCAGCTCATAAAATTTTTGAAAATTTTTAATCAAAATTTTAGGAGTATTTTGTTGATAATG       |
| TIR12-TTN2-F                | ATGCCTCGAGATTAACACTTTATTCAAAGATGATGAACCTGGTGGCT                                                 |
| TIR12-TTN2-R                | ATGCGGGCCCATTAACACTTTAAAGAAAACATCGACTTCAGCACCTA                                                 |
| TD40-TTN2-F                 | ATGCGTTTTAACTTTATTAACACTTAATTAATAATTTTTTACCTATATTTTCAAAGATGATGAACCTGGTGGCT                      |
| TD40-TTN2-R                 | ATGCGGGCCCTTTATTAACACTTTAAGAGCAGCTCATAAAATTTTTGAAAAGAAAACATCGACTTCAGCACCTA                      |
| TD60-TTN2-F                 | ATGCGTTTTAACTTTATTAACACTTAATTAATAATTTTTTACCTATATTTAAATCTTTCTAAAATTTTTTCAAAGATGATGAACCTGGTGGCT   |
| TD60-TTN2-R                 | ATGCGGGCCCTTTATTAACACTTTAAGAGCAGCTCATAAAATTTTTGAAAATTTTTAATCAAAATTTTTAAAGAAAACATCGACTTCAGCACCTA |
| TPB1 KD-check RT-PCR-F      | GAATCTGAGACTTCTTAGCA                                                                            |
| TPB1 KD-check RT-PCR-R      | TTCCATTAGAATCTCACAA                                                                             |
| PDD1 RT-PCR-F               | TTCTTAGTCTTATTGAGCTAACTC                                                                        |
| PDD1 RT-PCR-R               | CTGAGCTTGATATTTGAAGAA                                                                           |
| NB-G RT-PCR-F               | TAGTCAAATCTTTGTTTTCCGAGTC                                                                       |
| NB-G RT-PCR-R               | TAGCTGCGCCTAAATTGAAC                                                                            |
| LIA2IES-F                   | AAAATAGATCCAGATACAG                                                                             |
| LIA2IES-R                   | CTTGATTAGGGAAACCATTA                                                                            |
| IES-region_F-F              | CTTAAAAAAGTCAGTCCCT                                                                             |

|                                            |                                               |
|--------------------------------------------|-----------------------------------------------|
| IES-region_F-R                             | CAACTAAATAATAGGCAAAA                          |
| IES-region_H-F                             | TTGTAGCAATCACAATCACAAGTAG                     |
| IES-region_H-R                             | GGATTGTGCAGTAGATTTGTTAAGA                     |
| IES-region_K-F                             | TACCAGTATAATAATTCCGC                          |
| IES-region_K-R                             | CTCCTAGTAGTTCTTTGTTGTT                        |
| IES-region_N-rDNA-right TIR 3bp mutation-F | ATGCGTTTAAACTTTATTAATGTTTAATTAATAATTTTTTACCTA |
| IES-region_N-rDNA-right TIR 3bp mutation-R | ATGCGGGCCCTTTATTAACACTTTAAGAGCAGC             |
| TPB6 KO-5'f-F                              | GGTACC CTAGTACAGATTAACCTATTTGCAAATC           |
| TPB6 KO-5'f-R                              | GGATCC GATCAATTATTGAATTTACATTGAATGC           |
| TPB6 KO-3'f-F                              | CCCGGG GTTAATATCTTTAGAGAGGTAAATTGAAAG         |
| TPB6 KO-3'f-R                              | GAGCTC CTTGATATATGATAAATAAGACAGTTTTG          |
| TPB6 KO check 5'-end-F                     | GCAAAC TATTAATGTATTTAGTTAATAGG                |
| TPB6 KO check 5'-end-R                     | CAATCAGAATCAGTCTTTCTAGAGATTC                  |
| TPB6 KO check 3'-telomere end-F            | CATTTAATTTCTTAAAGAATATTTAACTTAC               |
| TPB6 KO check 3'-telomere end-R            | CCCCAACCCCAACCCCAA                            |
| DNA deletion assay in rDNA check-F         | AGATGTGATTCTTGAATCTCTCTTG                     |
| DNA deletion assay in rDNA check-R         | ATTTATAAGCAGTTGATTGAA                         |
